# Supplementary material for: An in situ derived MOF@In2S3 heterojunction stabilizes Co(ii)-salicylaldimine for efficient photocatalytic formic acid dehydrogenation
Source: Royal Society of Chemistry journal article supplement (doi:10.1039/d2cc01969h), 2022-01-01
Supplement: d2cc01969h1.pdf [file d2cc01969h1.pdf]

## Supporting Information

### **An *in situ* derived MOF@In<sub>2</sub>S<sub>3</sub> heterojunction stabilizes Co(II)-salicylaldimine for efficient photocatalytic formic acid dehydrogenation**

*Meijin Zhang<sup>a</sup>, Wenting Lin<sup>a</sup>, Liang Ma<sup>a</sup>, and Yunhong Pi<sup>a\*</sup>, Tiejun Wang<sup>a\*</sup>*

<sup>a</sup> School of Chemical Engineering and Light Industry, and Guangzhou Key Laboratory of Clean Transportation Energy and Chemistry, Guangdong University of Technology, Guangzhou 510006, P. R. China.

\*Corresponding author. E-mail: piyunhong@gdut.edu.cn; tjwang@gdut.edu.cn

## **Table of contents**

|                                                             |    |
|-------------------------------------------------------------|----|
| 1. Experimental Section .....                               | 3  |
| 2. Supplementary Figures of Material Characterizations..... | 9  |
| 3. Supplementary Tables .....                               | 15 |
| References .....                                            | 18 |

## 1. Experimental Section

### 1.1. Chemicals and Reagents.

Indium nitrate hydrate ( $\text{In}(\text{NO}_3)_3 \cdot x\text{H}_2\text{O}$ , 99.9%), 2-Aminoterephthalic Acid ( $\text{H}_2\text{BDC-NH}_2$ , 98%), N,N-dimethylformamide (DMF, 99.5%), Salicylaldehyde ( $\text{C}_7\text{H}_6\text{O}_2$ , 99%), Cobalt(II) perchlorate hexahydrate ( $\text{Co}(\text{ClO}_4)_2 \cdot 6\text{H}_2\text{O}$ , 98%), Iron(II) tetrafluoroborate hexahydrate ( $\text{Fe}(\text{BF}_4)_2 \cdot 6\text{H}_2\text{O}$ , 97%), ethanol (EtOH, 95%), Deuterium oxide ( $\text{D}_2\text{O}$ , 99.9%) were purchased from Aladdin Chemistry Co., Ltd. Thiourea ( $\text{CH}_4\text{N}_2\text{S}$ , 99.0%) was obtained from Damao Chemical Reagent Factory. N-N-Dimethylacetamide (DMA, 99.8%), Tetrahydrofuran (THF, 99.9%), Copper (II) chloride ( $\text{CuCl}_2$ , 99.8%), Nickel(II) chloride hexahydrate ( $\text{NiCl}_2 \cdot 6\text{H}_2\text{O}$ , 99.8%) were supplied from Shanghai Macklin Biochemical Co., Ltd. Methanol (MeOH) were purchased from Guanghua Chemicals. All the chemicals were used without further purification.

### 1.2. Solvothermal Synthesis of $\text{NH}_2\text{-MIL-68}$ .

$\text{NH}_2\text{-MIL-68}(\text{In})$  was synthesized by a solvothermal process. Typically,  $\text{H}_2\text{BDC-NH}_2$  (0.234 g) and  $\text{In}(\text{NO}_3)_3 \cdot x\text{H}_2\text{O}$  (1.156 g) were dissolved in 12.4 ml of DMF and stirred for 10 min. The resulting clear solution was subsequently transferred into a 35 ml Pyrex glassware and retained at 125 °C for 5 h, yielding a faint yellow precipitate by centrifugation and washed thoroughly with DMF after cooling down temperature. Then the obtained product was immersed in anhydrous methanol for purification at 60 °C for 48 h to remove the guest molecules present in the pores, and finally centrifuged and dried overnight under vacuum at room temperature.

### 1.3. Post-Solvothermal Treatment for $\text{NH}_2\text{-MIL-68@In}_2\text{S}_3$ .

The in-situ derived  $\text{NH}_2\text{-MIL-68@In}_2\text{S}_3$  heterostructure was prepared with  $\text{NH}_2\text{-MIL-68(In)}$  obtained in previous step as precursor. Briefly,  $\text{NH}_2\text{-MIL-68}$  (100 mg) was suspended in 15 ml ethanol in a 50 ml beaker followed by dropwise addition of a thiourea /ethanol solution (200 mg thiourea in 15 ml ethanol). The resulting mixture was stirred for 30 min and then transferred to a Teflon-lined autoclave, maintaining at 180 °C for 2 h. The solution was then cooled to room temperature, followed by filtration and washing with ethanol. Subsequently, the resulting product was purified in anhydrous ethanol at 60 °C for 48 h, and then collected before being dried overnight under vacuum at room temperature to afford  $\text{NH}_2\text{-MIL-68@In}_2\text{S}_3$  as a dark yellow solid. Through the identical sulfidation process with extended reaction time (12 h), pure  $\text{In}_2\text{S}_3$  with rod-like structure as  $\text{NH}_2\text{-MIL-68}$  was also synthesized as comparison.<sup>1</sup>

#### 1.4. Synthesis of Co-sal- $\text{NH}_2\text{-MIL-68@In}_2\text{S}_3$ .

Co-sal- $\text{NH}_2\text{-MIL-68@In}_2\text{S}_3$  was constructed via a two-step post-synthetic process with formation of salicylaldehyde moiety (sal-MOF) by salicylaldehyde modification and following metalation with cobalt salts to provide robust and highly active single-site solid catalytic centers. Firstly, 30 mg of as-obtained  $\text{NH}_2\text{-MIL-68@In}_2\text{S}_3$  was dispersed into 40 ml of methanol in a flask under ultrasound, and 12  $\mu\text{l}$  of salicylaldehyde was then added into the mixture, followed by reflux at 100 °C for 24 h. Afterwards, the precipitate was washed with abundant ethanol three times and dried under vacuum at room temperature overnight to give a light orange solid as sal- $\text{NH}_2\text{-MIL-68@In}_2\text{S}_3$ . Subsequently, the obtained sal- $\text{NH}_2\text{-MIL-68@In}_2\text{S}_3$  (10.0 mg) was suspended in 2 ml THF in a vial, following with the addition of  $\text{Co}(\text{ClO}_4)_2 \cdot 6\text{H}_2\text{O/THF}$

solution (2.73  $\mu\text{mol}$   $\text{Co}(\text{ClO}_4)_2 \cdot 6\text{H}_2\text{O}$  in 2.0 ml THF). The mixture was stirred slowly overnight for 24 h and the resulting deep orange solid was centrifuged out of suspension and washed with THF 4-5 times to afford the final powdery Co-sal-NH<sub>2</sub>-MIL-68@In<sub>2</sub>S<sub>3</sub>. ICP-OES analysis of the digested Co-sal-NH<sub>2</sub>-MIL-68@In<sub>2</sub>S<sub>3</sub> revealed a Co-loading of  $4.3 \times 10^{-3}$  wt%.

For comparison, M-sal-NH<sub>2</sub>-MIL-68@In<sub>2</sub>S<sub>3</sub> (M = Fe, Cu, Ni) were synthesized similarly as Co-sal-NH<sub>2</sub>-MIL-68@In<sub>2</sub>S<sub>3</sub> with the exception that  $\text{Co}(\text{ClO}_4)_2$  was replaced by  $\text{Fe}(\text{BF}_4)_2$ ,  $\text{CuCl}_2$ , or  $\text{NiCl}_2$ , respectively.

### 1.5. Characterization.

Powder X-ray diffraction (PXRD) data was collected on a MiniFlex 600 diffractometer using monochromatized Cu K $\alpha$  radiation ( $\lambda = 0.15418$  nm) source with a step size of  $0.02^\circ$  at  $10^\circ$  per minute. The Fourier-transform infrared (FTIR, Thermo-Filsher) spectroscopy measurements were conducted with Nicolet 6700 FTIR Spectrometric Analyzer using KBr pellets. The morphological study of the as-synthesized hybrid nanostructures was obtained through Scanning electron microscope (SEM, Hitach \*/SU8220), transmission electron microscopy (TEM, FEI, Thermo \*/Talos F200S). The interaction and chemical compositions of the composites were analyzed by X-ray photoelectron spectroscopy (XPS, ESCALAB 250Xi). UV-Vis diffused reflectance spectra (DRS) were carried out on a UV-Vis spectrophotometer (UV-2600i, Shimadzu, Japan), with BaSO<sub>4</sub> as a reflectance standard. An ASAP 2460 V2.01 apparatus (Micromeritics Instrument Corp., USA)

was applied to record the Brunauer-Emmett-Teller (BET) surface area and porous structure, with nitrogen adsorption and desorption isotherms of samples measured at 77 K after being degassed under vacuum at 150 °C for 6 h. Inductively coupled plasma-mass spectrometry (ICP-OES) data was recorded with an Agilent 730 ICP-OES. The photoluminescence spectra (PL) were observed on a fluorescence spectrometer (FLS 980, Edinburgh, England) with an excitation wavelength of 450 nm. The Mott-Schottky curves, photocurrent response and Cyclic voltammetry were performed on an electrochemical workstation (CHI660D) with a three-electrode cell with graphite rod as a counter electrode, Ag/AgCl as a reference electrode, and an electrolyte (0.5 M Na<sub>2</sub>SO<sub>4</sub> aqueous solution at pH=7). Electron spin-resonance (ESR) spectra were carried out with Bruker EMXnano at room temperature. Amounts of H<sub>2</sub> and CO etc. generated in the photocatalytic experiments were determined by gas chromatography (GC) using a GC9790PLUS with the Ar carrier gas and a TCD or FID detector.

### **1.6. Photocatalytic Hydrogen Evolution from Formic Acid.**

The photocatalytic H<sub>2</sub> evolution from FA was carried out in an externally illuminated reaction vessel with a magnetic stirrer, with samples prepared in a 5.0 ml septum-sealed glass vial. In the standard reaction, each sample was made up to a volume of 2.00 ml, including 1.80 ml DMA, 10 µl FA, 0.20 ml H<sub>2</sub>O, and 45 mg 1,3-dimethyl-2-phenyl-2,3-dihydro-1H-benzo[d]imidazole (BIH, 0.2 mmol) in addition to a certain amount of MOF catalyst. The sample vials were capped and sealed, and deoxygenated by bubbling nitrogen for 5 minutes to ensure complete removal of air. Keeping at room temperature, the solution was irradiated by a 300 W Xe lamp (PLS-

SXE300+>420 nm) equipped with a cooling fan for 24 hours. After the hydrogen evolution reaction, the gas in the headspace of the vial is analyzed by GC to determine the amount of H<sub>2</sub> produced. TON of H<sub>2</sub> evolution reaction was calculated based on the amount of catalytic Co sites.

### **1.7. Recycle tests of Co-sal-NH<sub>2</sub>-MIL-68@In<sub>2</sub>S<sub>3</sub> catalyzed photocatalytic Hydrogen Evolution from Formic Acid.**

Recycle tests on Co-sal-NH<sub>2</sub>-MIL-68@In<sub>2</sub>S<sub>3</sub> for photocatalytic hydrogen evolution from formic acid was carried out to demonstrate the stability and reusability of the present catalytic MOF system. Specifically, hydrogen evolution recycle reactions were conducted with Co-sal-NH<sub>2</sub>-MIL-68@In<sub>2</sub>S<sub>3</sub> catalyst (7.32 nmol Co site), and 45 mg BIH, in 10  $\mu$ L FA + 1.8 mL DMA+0.2 mL H<sub>2</sub>O, under >420 nm Xe lamp for 24 h. The solution was degassed with N<sub>2</sub> for 5 min before each run and 5 mg of BIH was added to the solution after each run.

### **1.8. Photoelectrochemical measurements.**

The working photoelectrodes were prepared as follows: 4 mg of photocatalyst powders were dispersed in mixed solution containing 1 ml of THF and 40  $\mu$ l of Nafion with ultrasound treatment for 30 min. Then the mixed solution was dropped and dried several times on Glassy carbon electrode (0.25 $\times$ 0.25  $\pi$  cm<sup>2</sup>). The photocurrent response curves, linear sweep voltammetry (LSV), Cyclic voltammograms (CV), electrochemical impedance spectroscopy (EIS) and Mott-Schottky plots were accomplished in an electrochemical workstation using three electrode system, in which a graphite rod, a saturated Ag/AgCl and the prepared photoelectrode were used as counter electrode, reference electrode and working

electrode, respectively. A 300 W Xe lamp was used as light sources and Na<sub>2</sub>SO<sub>4</sub> aqueous solution (0.5 M) was chose as electrolyte (CV features was conducted in 10 ml 0.1 M TBAH (Tetrabutyl-ammonium hexafluorophosphate) /DMA solution with 1 ml H<sub>2</sub>O with a scan rate of 50 mV/s.). The Mott-Schottky measurement was conducted in the potential range from -1.2 to 0 V with the frequency of 0.5 and 1.0 kHz, respectively.

### 1.9. Calculation of turnover number (TON).

The calculation of turnover number (TON) over Co-sal-NH<sub>2</sub>-MIL-68@In<sub>2</sub>S<sub>3</sub> was using the following equation:

$$\text{TON} = \frac{\text{moles of evolved products gas}}{\text{moles of active sites on photocatalysts}}$$

### 1.10. Calculation of apparent quantum efficiency (AQE).

The apparent quantum efficiency (AQE) for H<sub>2</sub> evolution was evaluated by a 300 W Xe lamp (PLS-SXE300+). The monochromatic wavelength of light ( $\lambda$ ) was set at 420 nm. The amount of generated H<sub>2</sub> was analyzed by GC after 24 hours of light irradiation. AQE under the different wavelengths were calculated by the following equation:

$$\text{AQE(\%)} = \frac{N_e}{N_p} = \frac{(2 \times \text{number of evolved } H_2 \text{ molecules})}{(\text{number of incident photons})}$$

## 2. Supplementary Figures of Material Characterizations

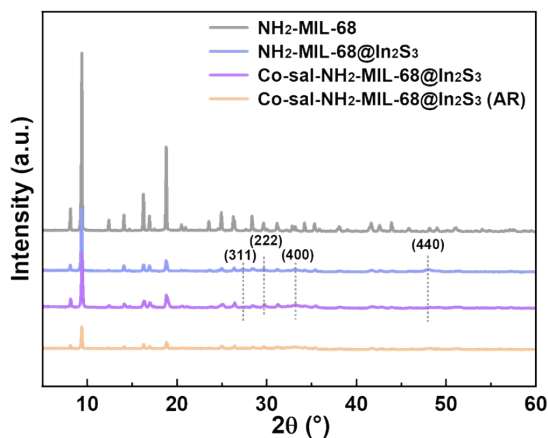

**Figure S1.** PXRD patterns of NH<sub>2</sub>-MIL-68, NH<sub>2</sub>-MIL-68@In<sub>2</sub>S<sub>3</sub> and Co-sal-NH<sub>2</sub>-MIL-68@In<sub>2</sub>S<sub>3</sub> before and after photocatalytic H<sub>2</sub> evolution from FA reaction.

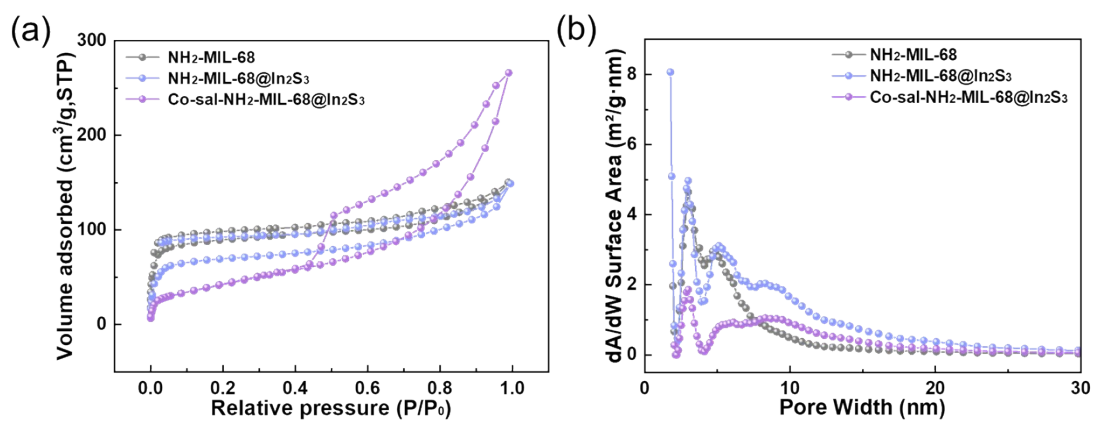

**Figure S2.** a) N<sub>2</sub> adsorption isotherms and b) pore size distribution of NH<sub>2</sub>-MIL-68, NH<sub>2</sub>-MIL-68@In<sub>2</sub>S<sub>3</sub> and Co-sal-NH<sub>2</sub>-MIL-68@In<sub>2</sub>S<sub>3</sub>.

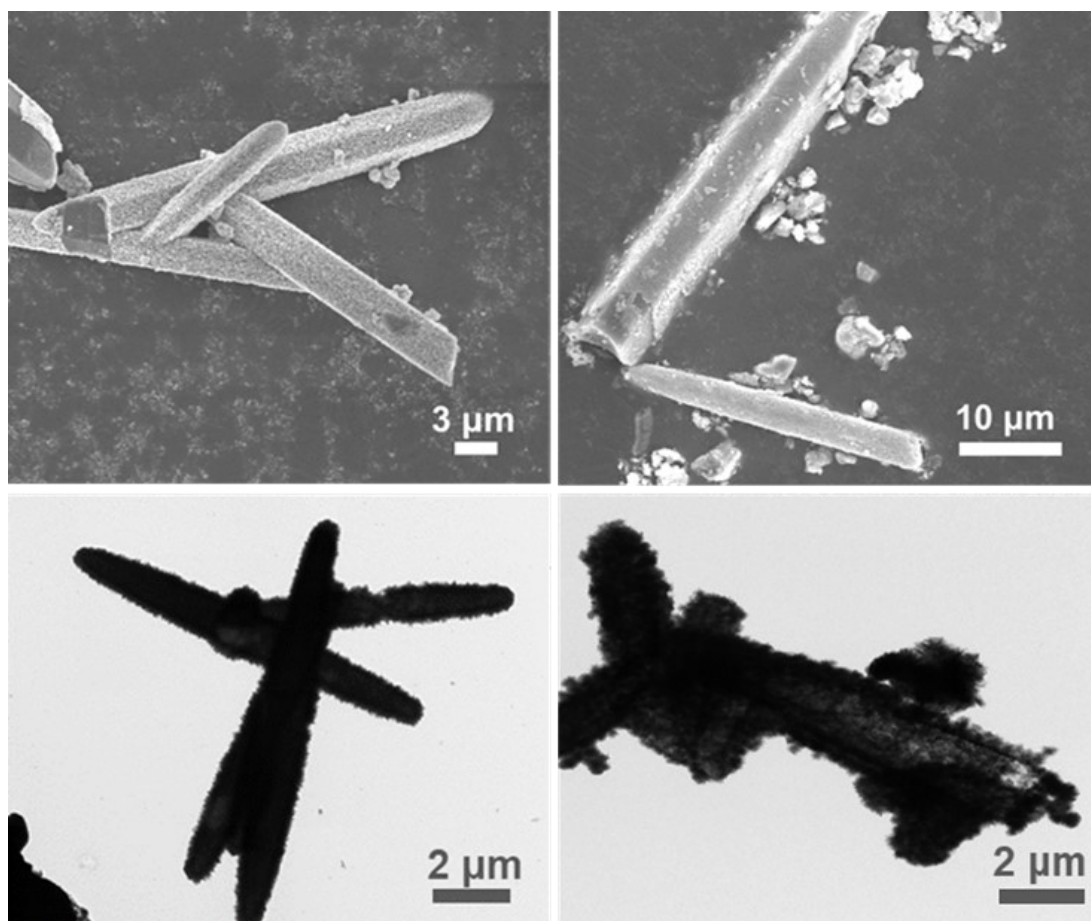

**Figure S3.** SEM and TEM images of Co-sal-NH<sub>2</sub>-MIL-68@In<sub>2</sub>S<sub>3</sub> after photocatalytic H<sub>2</sub> evolution from FA reaction.

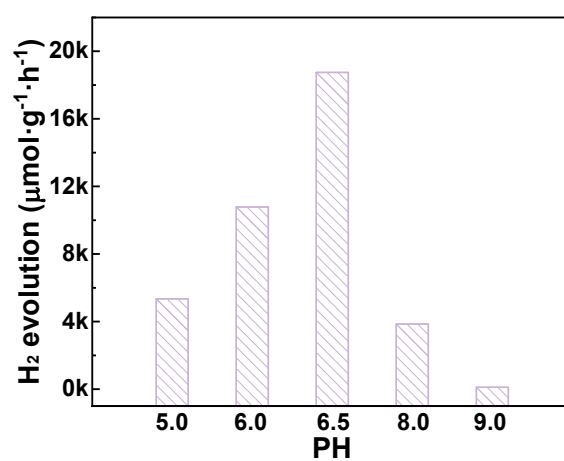

**Figure S4.** Photocatalytic H<sub>2</sub> generation with various pH values.

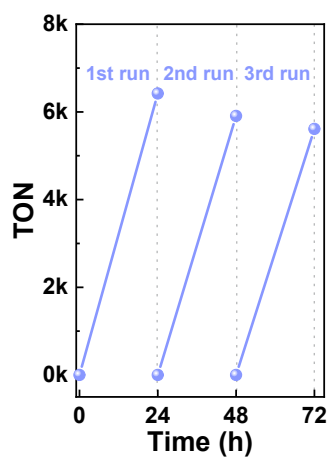

**Figure S5.** Recycle Test of Co-sal-NH<sub>2</sub>-MIL-68@In<sub>2</sub>S<sub>3</sub> catalyzed photocatalytic H<sub>2</sub> evolution in three consecutive runs.

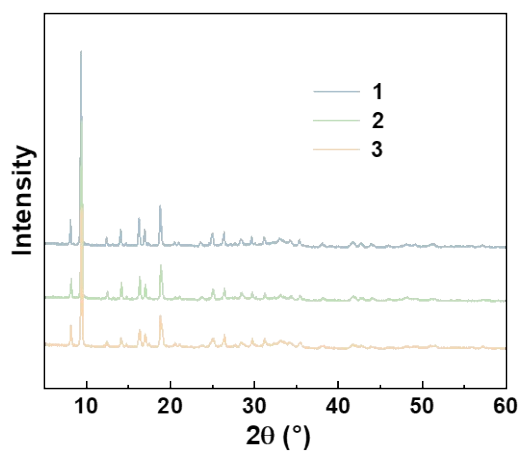

**Figure S6.** XRD of Co-sal-NH<sub>2</sub>-MIL-68@In<sub>2</sub>S<sub>3</sub> synthesized from three parallel experiments.

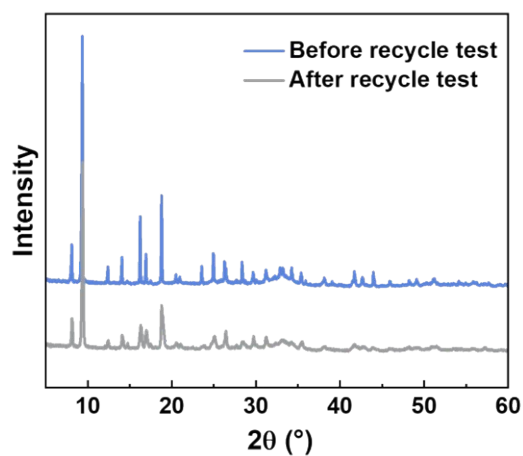

**Figure S7.** XRD patterns before and after the recycle test of Co-sal-NH<sub>2</sub>-MIL-68@In<sub>2</sub>S<sub>3</sub> catalyzed photocatalytic H<sub>2</sub> evolution.

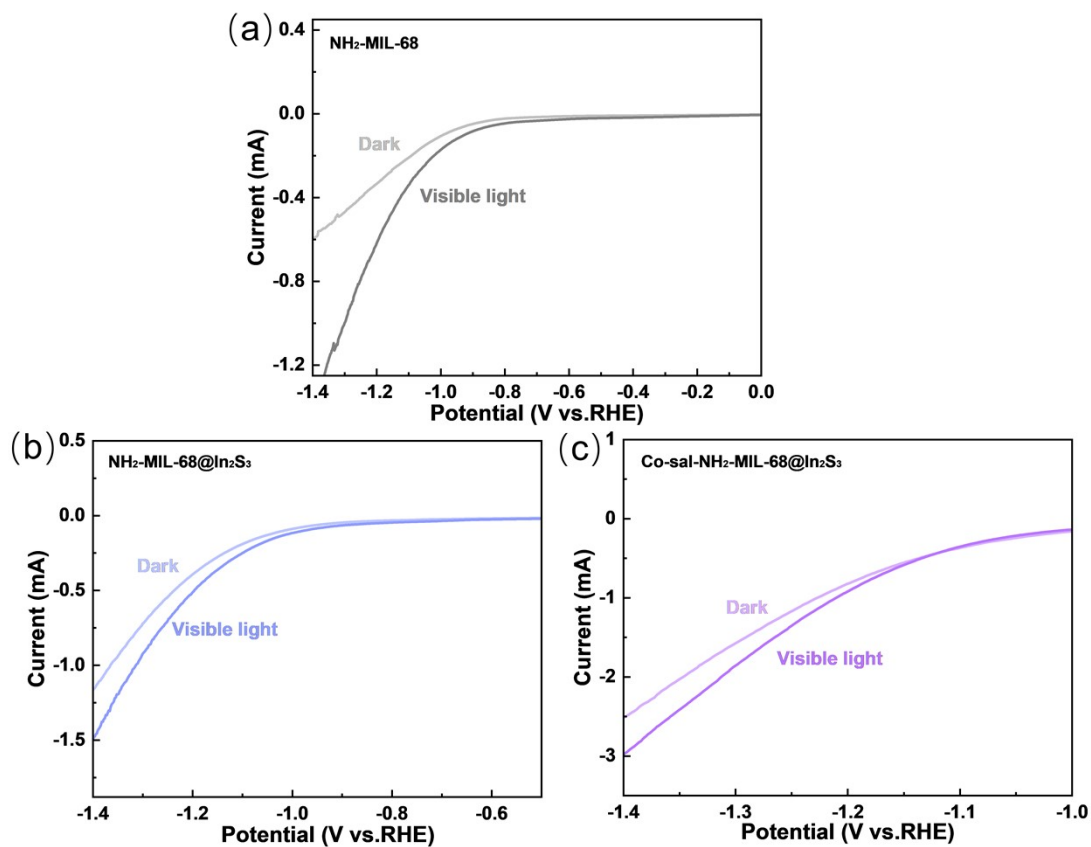

**Figure S8.** Current–voltage curve of NH<sub>2</sub>-MIL-68 (a), NH<sub>2</sub>-MIL-68@In<sub>2</sub>S<sub>3</sub> (b) and Co-sal-NH<sub>2</sub>-MIL-68@In<sub>2</sub>S<sub>3</sub> (c) in a three-compartment cell under visible-light illumination ( $\lambda > 420$  nm).

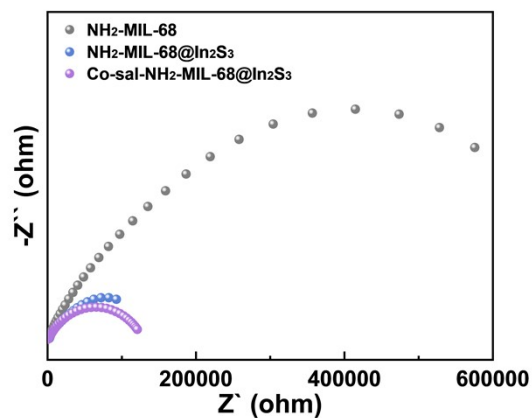

**Figure S9.** EIS Nyquist plots of the as-prepared  $\text{NH}_2\text{-MIL-68}$ ,  $\text{NH}_2\text{-MIL-68@In}_2\text{S}_3$  and  $\text{Co-sal-NH}_2\text{-MIL-68@In}_2\text{S}_3$ .

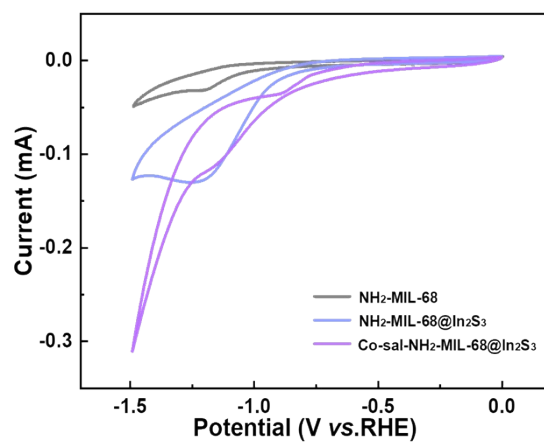

**Figure S10.** CV scans of the as-prepared  $\text{NH}_2\text{-MIL-68}$ ,  $\text{NH}_2\text{-MIL-68@In}_2\text{S}_3$  and  $\text{Co-sal-NH}_2\text{-MIL-68@In}_2\text{S}_3$ .

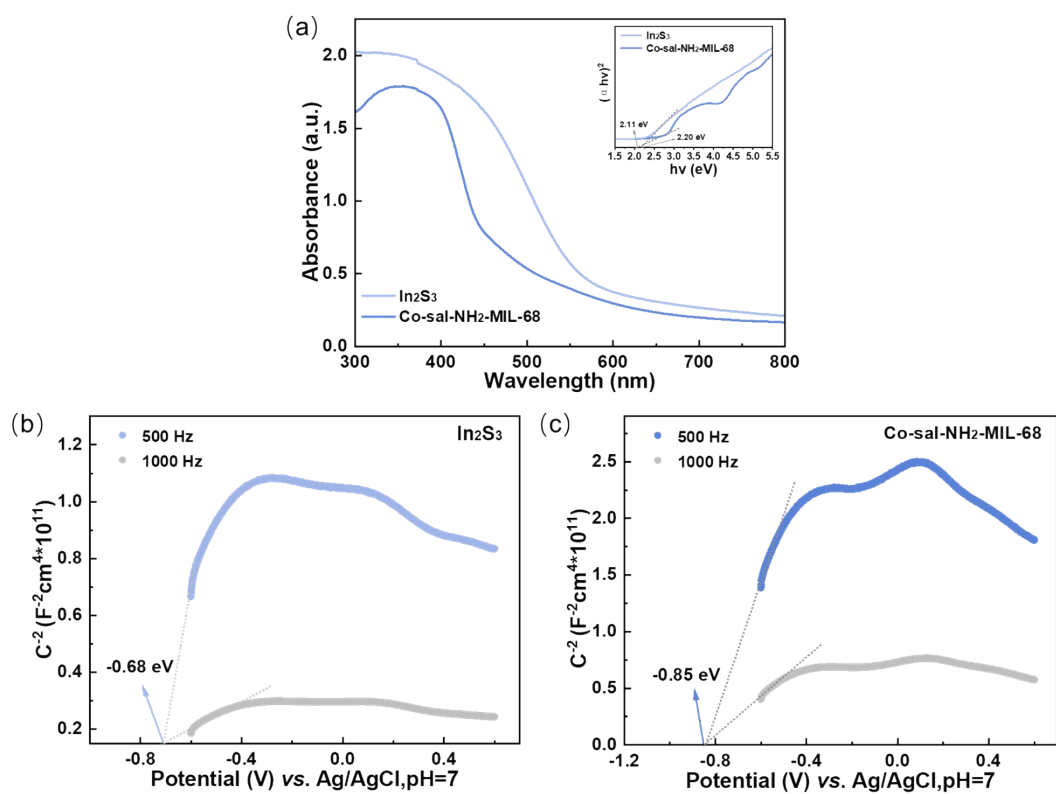

**Figure S11.** a) UV-vis DRS spectra and plots of  $(\alpha h\nu)^{1/2}$  vs. photon energy of MOF-derived  $\text{In}_2\text{S}_3$ , and  $\text{Co-sal-NH}_2\text{-MIL-68}$ ; b-c) Mott-Schottky plots of MOF-derived  $\text{In}_2\text{S}_3$  and  $\text{Co-sal-NH}_2\text{-MIL-68}$ .

### 3. Supplementary Tables

**Table S1.** BET surface area, pore volume and pore diameter of NH<sub>2</sub>-MIL-68, NH<sub>2</sub>-MIL-68@In<sub>2</sub>S<sub>3</sub> and Co-sal-NH<sub>2</sub>-MIL-68@In<sub>2</sub>S<sub>3</sub>

| Sample                                                        | BET<br>(m <sup>2</sup> ·g <sup>-1</sup> ) | BJH pore<br>volume<br>(cm <sup>3</sup> ·g <sup>-1</sup> ) | BJH Desorption<br>average pore diameter<br>(nm) |
|---------------------------------------------------------------|-------------------------------------------|-----------------------------------------------------------|-------------------------------------------------|
| NH <sub>2</sub> -MIL-68                                       | 368                                       | 0.08                                                      | 6.89                                            |
| NH <sub>2</sub> -MIL-68@In <sub>2</sub> S <sub>3</sub>        | 274                                       | 0.18                                                      | 10.47                                           |
| Co-sal-NH <sub>2</sub> -MIL-68@In <sub>2</sub> S <sub>3</sub> | 133                                       | 0.09                                                      | 12.02                                           |

**Table S2.** Condition screening of solvent amounts of photocatalytic H<sub>2</sub> evolution catalyzed by Co-sal-NH<sub>2</sub>-MIL-68@In<sub>2</sub>S<sub>3</sub>.<sup>a</sup>

| Entry           | Sacrificial Agent | DMA / ml    | H <sub>2</sub> O / ml | FA / μl   | Efficiency /<br>μmolg <sup>-1</sup> h <sup>-1</sup> |
|-----------------|-------------------|-------------|-----------------------|-----------|-----------------------------------------------------|
| 1               | BIH               | 2.0         | -                     | -         | 0                                                   |
| 2               | BIH               | 2.0         | -                     | 10        | 1029                                                |
| 3               | BIH               | 1.95        | 0.05                  | 10        | 2900                                                |
| 4               | BIH               | 1.90        | 0.10                  | 10        | 15087                                               |
| 5               | BIH               | 1.75        | 0.25                  | 10        | 18370                                               |
| <b>6</b>        | <b>BIH</b>        | <b>1.80</b> | <b>0.20</b>           | <b>10</b> | <b>18746</b>                                        |
| 7               | BIH               | 1.80        | 0.20                  | -         | 3                                                   |
| 8               | BIH               | 1.80        | 0.20                  | 20        | 1684                                                |
| 9               | BIH               | 1.80        | 0.20                  | 30        | 371                                                 |
| 10              | BIH               | 1.80        | 0.20                  | 50        | 143                                                 |
| 11 <sup>b</sup> | BIH               | 1.80        | 0.20                  | 10        | 0                                                   |
| 12 <sup>c</sup> | BIH               | 1.80        | 0.20                  | 10        | 11176                                               |
| 13 <sup>d</sup> | BIH               | 1.80        | 0.20                  | 10        | 1309                                                |
| 14 <sup>e</sup> | BIH               | 1.80        | 0.20                  | 10        | 1159                                                |
| 15 <sup>f</sup> | BIH               | 1.80        | 0.20                  | 10        | 607                                                 |

<sup>a</sup> Unless noted, photocatalytic H<sub>2</sub> evolution from FA reactions were conducted with Co-sal-NH<sub>2</sub>-MIL-68@In<sub>2</sub>S<sub>3</sub> catalyst (7.32 nmol Co site), and 45 mg BIH under visible-light illumination ( $\lambda > 420$  nm) for 24 h. <sup>b</sup> Catalyst: Co-sal-NH<sub>2</sub>-MIL-68@In<sub>2</sub>S<sub>3</sub> (0 nmol Co site). <sup>c</sup> Catalyst: Co-sal-NH<sub>2</sub>-MIL-68@In<sub>2</sub>S<sub>3</sub> (3.66 nmol Co site). <sup>d</sup> Catalyst: Co-sal-NH<sub>2</sub>-MIL-68@In<sub>2</sub>S<sub>3</sub> (10.98 nmol Co site). <sup>e</sup> Catalyst: Co-sal-NH<sub>2</sub>-MIL-68@In<sub>2</sub>S<sub>3</sub> (14.64 nmol Co site). <sup>f</sup> Catalyst: Co-sal-NH<sub>2</sub>-MIL-68@In<sub>2</sub>S<sub>3</sub> (21.96 nmol Co site).

**Table S3.** Control experiments of photocatalytic H<sub>2</sub> evolution from FA. <sup>a</sup>

| Entry    | Catalyst                                                                                        | Efficiency (μmolg <sup>-1</sup> h <sup>-1</sup> ) | TON         | H <sub>2</sub> Selectivity (%) |
|----------|-------------------------------------------------------------------------------------------------|---------------------------------------------------|-------------|--------------------------------|
| 1        | Co(ClO <sub>4</sub> ) <sub>2</sub> + sal-NH <sub>2</sub> -MIL-68                                | 437                                               | 143         | 97.8                           |
| 2        | Co(ClO <sub>4</sub> ) <sub>2</sub> + sal-NH <sub>2</sub> -MIL-68@In <sub>2</sub> S <sub>3</sub> | 10277                                             | 3369        | 99.9                           |
| 3        | Co-sal-NH <sub>2</sub> -MIL-68+In <sub>2</sub> S <sub>3</sub>                                   | 1709                                              | 560         | 99.4                           |
| 4        | Co(ClO <sub>4</sub> ) <sub>2</sub> + NH <sub>2</sub> -MIL-68@In <sub>2</sub> S <sub>3</sub>     | 5731                                              | 1879        | 99.8                           |
| 5        | Co(ClO <sub>4</sub> ) <sub>2</sub> + sal-NH <sub>2</sub> -MIL-68+In <sub>2</sub> S <sub>3</sub> | 1017                                              | 667         | 99.2                           |
| <b>6</b> | <b>Co-sal-NH<sub>2</sub>-MIL-68@In<sub>2</sub>S<sub>3</sub></b>                                 | <b>18746</b>                                      | <b>6146</b> | <b>99.9</b>                    |

<sup>a</sup> Unless noted, photocatalytic H<sub>2</sub> evolution from FA reactions were conducted with MOF or control catalysts (containing 7.32 nmol Co site), and 45 mg BIH, in 10 μl FA + 1.80 ml DMA+0.2 mL H<sub>2</sub>O, under visible-light illumination (λ > 420 nm) for 24 h.

**Table S4.** Parallel experiment of photocatalytic H<sub>2</sub> evolution from FA. <sup>a</sup>

| Entry | Efficiency (μmolg <sup>-1</sup> h <sup>-1</sup> ) | TON  | H <sub>2</sub> Selectivity (%) |
|-------|---------------------------------------------------|------|--------------------------------|
| 1     | 18746                                             | 6146 | 99.9                           |
| 2     | 18023                                             | 5908 | 99.9                           |
| 3     | 18713                                             | 6134 | 99.9                           |

<sup>a</sup> Unless noted, photocatalytic H<sub>2</sub> evolution from FA reactions were conducted with MOF or control catalysts (containing 7.32 nmol Co site), and 45 mg BIH, in 10 μl FA + 1.80 ml DMA+0.2 mL H<sub>2</sub>O, under visible-light illumination (λ > 420 nm) for 24 h.

**Table S5.** Photocatalytic activities of salicylaldimine moiety stabilized Cu, Fe, Ni catalytic sites. <sup>a</sup>

| Sample                                                        | TON  | H <sub>2</sub> Selectivity (%) |
|---------------------------------------------------------------|------|--------------------------------|
| Cu-sal-NH <sub>2</sub> -MIL-68@In <sub>2</sub> S <sub>3</sub> | 367  | 99.4                           |
| Fe-sal-NH <sub>2</sub> -MIL-68@In <sub>2</sub> S <sub>3</sub> | 1169 | 99.8                           |
| Ni-sal-NH <sub>2</sub> -MIL-68@In <sub>2</sub> S <sub>3</sub> | 5724 | 99.7                           |

<sup>a</sup> Reactions were conducted with MOF catalysts (containing 8 nmol Cu/ Fe /Ni site), and 45 mg BIH, in 10 μl FA + 1.80 ml DMA + 0.2 ml H<sub>2</sub>O, under visible-light illumination (λ > 420 nm) for 24 h.

**Table S6.** Comparison of activities over different systems for photocatalytic H<sub>2</sub> evolution from FA

| System          | Catalyst                                                      | Light source              | Sacrificial Agent | Reaction Conditions                              | Efficiency (μmolg <sup>-1</sup> h <sup>-1</sup> ) | TON   | Year               |
|-----------------|---------------------------------------------------------------|---------------------------|-------------------|--------------------------------------------------|---------------------------------------------------|-------|--------------------|
| Carbon material | PdAg@g-C <sub>3</sub> N <sub>4</sub>                          | Xe lamp > 400 nm          | /                 | HCOOH (1 M)                                      | 552000                                            | 315   | 2018 <sup>2</sup>  |
|                 | Au <sub>x</sub> Pd <sub>y</sub> /CNS                          | Xe lamp > 420 nm          | /                 | 1M HCOOH/HCOONa (4:1)                            | 72000                                             | 170   | 2019 <sup>3</sup>  |
|                 | Ag <sub>0.1</sub> Pd <sub>0.9</sub> /2D CNNs                  | Xe lamp > 400 nm          | /                 | HCOOH/HCOONa (3:1)                               | 2316000                                           | 61    | 2020 <sup>4</sup>  |
|                 | AuPdNi/DC N-10-APTS                                           | Xe lamp > 420 nm          | EDTA-2Na          | HCOOH/HCOONa (1:1)                               | 1493000                                           | 5148  | 2021 <sup>5</sup>  |
|                 | PF-Mo <sub>1.98</sub> C <sub>1.02</sub>                       | Sunlight                  | /                 | HCOOH/HCOONa (1:3)                               | 25800                                             | -     | 2021 <sup>6</sup>  |
| Semiconductor   | QD-MPA/CoCl <sub>2</sub>                                      | Xe lamp > 420 nm          | /                 | HCOOH/HCOONa                                     | 120000                                            | 10223 | 2015 <sup>7</sup>  |
|                 | CdS/Fe-salen                                                  | Xe lamp > 420 nm          | /                 | H <sub>2</sub> O/CH <sub>3</sub> CN (3:1) PH 3.5 | 150000                                            | 1125  | 2020 <sup>8</sup>  |
|                 | FeP@CdS                                                       | Xe lamp > 420 nm          | /                 | HCOOH (4 M) PH 3.5                               | 278000                                            | 311   | 2021 <sup>9</sup>  |
|                 | NiCoP@CdS                                                     | Xe lamp > 420 nm          | /                 | HCOOH (4 M) PH 3.5                               | 354000                                            | 1684  | 2021 <sup>10</sup> |
| Oxide           | Au@SiO <sub>2</sub> -Pt                                       | Xe lamp > 420 nm          | /                 | HCOOH/H <sub>2</sub> O (1:100)                   | 50 μmolg <sup>-1</sup> Pt                         | 9     | 2021 <sup>11</sup> |
|                 | BFO                                                           | 250 nm < Xe lamp < 500 nm | /                 | HCOOH (0.1 M) PH 3                               | 30                                                | -     | 2018 <sup>12</sup> |
| Polymer         | PCN-520-F                                                     | LED lamp                  | /                 | 5%HCOOH 0.5%Pt                                   | 1600                                              | 63    | 2020 <sup>13</sup> |
| MOF             | Au@Pd/Uio-66(Zr <sub>85</sub> Ti <sub>15</sub> )              | Xe lamp > 420 nm          | /                 | H <sub>2</sub> O/HCOOH (100:3)                   | 357100                                            | 400   | 2016 <sup>14</sup> |
|                 | CdS@ZIF-8                                                     | Xe lamp > 420 nm          | /                 | HCOOH/HCOONa (3:1) H <sub>2</sub> PtCl           | 900                                               | -     | 2016 <sup>15</sup> |
|                 | Co-sal-NH <sub>2</sub> -MIL-68@In <sub>2</sub> S <sub>3</sub> | Xe lamp > 420 nm          | BIH               | DMA/H <sub>2</sub> O/FA (180:20:1)               | 18746                                             | 6146  | This work          |

## References

1. Q. Hou, X. Li, et al, Construction of  $\text{In}_2\text{S}_3@\text{NH}_2\text{-MIL-68(In)}@\text{In}_2\text{S}_3$  Sandwich Homologous Heterojunction for Efficient  $\text{CO}_2$  Photoreduction. *Ind. Eng. Chem. Res.* **2020**, 59, 47, 20711.
2. X. Du, J. Sun, et al. Photocatalytic dehydrogenation of formic acid promoted by a superior  $\text{PdAg@g-C}_3\text{N}_4$  Mott–Schottky heterojunction. *Nanoscale Adv.*, **2021**, 3, 4447.
3. D. Yu, L. Li, et al. Plasmonic AuPd-based Mott-Schottky photocatalyst for synergistically enhanced hydrogen evolution from formic acid and aldehyde. *Appl. Catal. Environ. B*, **2019**, 251, 66.
4. C. Wan, L. Zhou, et al. Boosting visible-light-driven hydrogen evolution from formic acid over  $\text{AgPd/2Dg-C}_3\text{N}_4$  nanosheets Mott-Schottky photocatalyst. *Chem. Eng. J.*, **2020**, 396, 125229.
5. G. Huang, X. Gu, et al. Alkylamine-Grafted Organic Semiconductors with Plasma-Induced Defects as Electron Promoters of CO-Resistant Pd-Based Nanoparticles for Efficient Light-Driven On-Demand  $\text{H}_2$  Generation. *ACS Appl. Energy Mater.*, **2021**, 4, 704.
6. C. Lv, P. Lou, et al. Efficient hydrogen production via sunlight-driven thermal formic acid decomposition over a porous film of molybdenum carbide. *J. Mater. Chem. A*, **2021**, 9, 22481.
7. Kuehnel, M.F., Wakerley, D.W., et al. Photocatalytic Formic Acid Conversion on CdS Nanocrystals with Controllable Selectivity for  $\text{H}_2$  or CO. *Angew. Chem. Int. Ed.*, **2015**, 54, 9627.
8. R. M. Irfan, T. Wang, et al. Homogeneous Molecular Iron Catalysts for Direct Photocatalytic Conversion of Formic Acid to Syngas ( $\text{CO}+\text{H}_2$ ). *Angew. Chem. Int. Ed.*, **2020**, 59, 14818.
9. T. Wang, L. Yang, et al. CdS Nanorods Anchored with Crystalline FeP Nanoparticles for Efficient Photocatalytic Formic Acid Dehydrogenation. *ACS Appl. Mater. Interfaces*, **2021**, 13, 20, 23751.
10. H. Cao, T. Wang, et al. NiCoP nanoparticles anchored on CdS nanorods for enhanced hydrogen production by visible light-driven formic acid dehydrogenation. *Int. J. Hydrog. Energy*, **2021**, 46, 64, 32435.

11. X. Yuan, W. Zhen, et al. Plasmon Coupling Induced Hot Electrons for Photocatalytic Hydrogen Generation. *Chem. Asian J.* **2021**, 16, 3683.
12. W. Ramadan, R. Dillert, et al. Changes in the solid-state properties of bismuth iron oxide during the photocatalytic reformation of formic acid. *Catal. Today*, **2019**, 326, 22.
13. Y. Li, R. He, P. Han, et al. A new concept: Volume photocatalysis for efficient H<sub>2</sub> generation Using low polymeric carbon nitride as an example. *Appl. Catal. Environ. B*, **2020**, 279, 119379.
14. M. Wen, Kohsuke Mori, et al. Plasmonic Au@Pd Nanoparticles Supported on a Basic Metal–Organic Framework: Synergic Boosting of H<sub>2</sub> Production from Formic Acid. *ACS Energy Lett.*, **2017**, 2, 1, 1.
15. Zeng, M., Chai, Z., Deng, X. et al. Core–shell CdS@ZIF-8 structures for improved selectivity in photocatalytic H<sub>2</sub> generation from formic acid. *Nano Res.*, **2016**, 9, 2729.
